# Supplementary material for: Ionic Liquids Impact the Bioenergy Feedstock-Degrading Microbiome and Transcription of Enzymes Relevant to Polysaccharide Hydrolysis
Source: PubMed Central journal article supplement (PMC5155067; doi:10.1128/msystems.00120-16), 2016-12-13
Supplement: sys006162071st1.pdf [file sys006162071st1.pdf]

Table S1. Data set sizes of the 16S amplicons, metagenomes, and metatranscriptomes

| Samples  | 16S amplicon | Metagenome | Metatranscriptome |
|----------|--------------|------------|-------------------|
| Inoculum |              | 17G bps    | 29G bps           |
| 0% IL    |              | 25G bps    | 15G bps           |
| 0.5% IL  |              | 19G bps    | 26G bps           |
| 1% IL    |              | 25G bps    | 12G bps           |
| 2% IL    |              | 28G bps    | 24G bps           |
