# Supplementary material for: Ionic Liquids Impact the Bioenergy Feedstock-Degrading Microbiome and Transcription of Enzymes Relevant to Polysaccharide Hydrolysis
Source: PubMed Central journal article supplement (PMC5155067; doi:10.1128/msystems.00120-16), 2016-12-13
Supplement: sys006162071st2.pdf [file sys006162071st2.pdf]

Table S2. Taxonomic and genome information of the recovered genome bins.

| Bin | Phylum                      | Closest species (amino acid identity)                                      | Completeness <sup>a</sup> | Genome size | GC % |
|-----|-----------------------------|----------------------------------------------------------------------------|---------------------------|-------------|------|
| 001 | Proteobacteria              | <i>Thioalkalivibrio sulfidophilus</i> (64.06%)                             | 94.40%                    | 3475536     | 64.1 |
| 002 | Proteobacteria              | <i>Sphingobium</i> sp. SYK-6 (64.93%)                                      | 95.30%                    | 3665541     | 67.7 |
| 003 | Proteobacteria              | <i>Pseudoxanthomonas suwonensis</i> (82.38%)                               | 83.20%                    | 2502625     | 72.5 |
| 004 | Bacteroidetes               | <i>Niabella aurantiaca</i> (72.92%)                                        | 84.10%                    | 2984673     | 40.7 |
| 005 | Chloroflexi                 | <i>Anaerolinea thermophila</i> (58.78%)                                    | 90.70%                    | 4812602     | 60.8 |
| 006 | Proteobacteria              | <i>Luteimonas</i> sp. J29 (80.66%)                                         | 95.30%                    | 2820705     | 69.8 |
| 007 | Planctomycetes              | <i>Phycisphaera mikurensis</i> (60.68%)                                    | 90.70%                    | 3989218     | 70.6 |
| 008 | Proteobacteria              | <i>Chelatococcus</i> sp. GW1 (90.67%)                                      | 91.60%                    | 3208607     | 68.1 |
| 009 | Proteobacteria              | <i>Caldimonas manganoxidans</i> (79.51%)                                   | 99.10%                    | 3870094     | 70.3 |
| 010 | Actinobacteria              | <i>Streptosporangium roseum</i> (74.40%)                                   | 83.20%                    | 4884654     | 72.6 |
| 011 | Actinobacteria              | <i>Candidatus Actinomarina minuta</i> (60.11%)                             | 88.80%                    | 2562596     | 69.3 |
| 012 | (unclassified) <sup>b</sup> | <i>Candidatus Saccharibacteria bacterium</i><br>GW2011_GWA2_46_10 (65.16%) | 56.10%                    | 1081956     | 53.5 |
| 013 | Gemmatimonadetes            | Gemmatimonadetes bacterium KBS708 (60.34%)                                 | 93.50%                    | 4038678     | 70.9 |
| 014 | Actinobacteria              | <i>Mycobacterium thermoresistibile</i> (80.84%)                            | 90.70%                    | 4017704     | 72   |
| 015 | Proteobacteria              | <i>Chelativorans</i> sp. J32 (81.72%)                                      | 87.90%                    | 4187552     | 63.1 |
| 016 | Actinobacteria              | <i>Thermomonospora curvata</i> (99.61%)                                    | 97.20%                    | 5373478     | 71.8 |
| 017 | Actinobacteria              | <i>Solirubrobacterales</i> bacterium URHD0059 (73.87%)                     | 89.70%                    | 2464499     | 73.1 |
| 018 | Acidobacteria               | <i>Candidatus Solibacter usitatus</i> (61.23%)                             | 93.50%                    | 3266445     | 69.4 |
| 019 | Actinobacteria              | <i>Chelativorans</i> sp. J32 (77.62%)                                      | 96.30%                    | 4498608     | 62.6 |
| 020 | (Eukaryote) <sup>c</sup>    |                                                                            |                           | 531264      | 32.8 |
| 021 | Proteobacteria              | <i>Filomicrobium</i> sp. W (69.74%)                                        | 83.20%                    | 3630912     | 60.5 |
| 022 | Actinobacteria              | <i>Conexibacter woesei</i> (65.02%)                                        | 87.90%                    | 2682778     | 73   |
| 023 | Proteobacteria              | <i>Alkalilimnicola ehrlichii</i> (68.99%)                                  | 99.10%                    | 4011724     | 68.6 |
| 024 | Planctomycetes              | <i>Pirellula staleyi</i> (62.55%)                                          | 92.50%                    | 6004265     | 64   |

|     |                     |                                                     |         |         |      |
|-----|---------------------|-----------------------------------------------------|---------|---------|------|
| 025 | Proteobacteria      | <i>Nitrosococcus halophilus</i> (60.31%)            | 92.50%  | 4628292 | 61.8 |
| 026 | Proteobacteria      | <i>Nitrosococcus halophilus</i> (60.28%)            | 98.10%  | 3400277 | 62.1 |
| 027 | Chloroflexi         | <i>Roseiflexus</i> sp. RS-1 (72.01%)                | 75.70%  | 6073077 | 71.2 |
| 028 | Proteobacteria      | <i>Sorangium cellulosum</i> (61.99%)                | 95.30%  | 8172849 | 69.9 |
| 029 | Actinobacteria      | <i>Candidatus Microthrix parvicella</i> (63.27%)    | 85.00%  | 3310956 | 75.6 |
| 030 | Actinobacteria      | <i>Ilumatobacter coccineus</i> (68.40%)             | 93.50%  | 3893026 | 72.7 |
| 031 | Chloroflexi         | <i>Sphaerobacter thermophilus</i> (64.36%)          | 93.50%  | 4746850 | 65.8 |
| 032 | Deinococcus-Thermus | <i>Truepera radiovictrix</i> (66.43%)               | 68.20%  | 2880669 | 73.6 |
| 033 | Chloroflexi         | <i>Roseiflexus</i> sp. RS-1 (68.69%)                | 98.10%  | 6996601 | 58.8 |
| 034 | Planctomycetes      | <i>Phycisphaera mikurensis</i> (59.06%)             | 93.50%  | 4093275 | 64.1 |
| 035 | Acidobacteria       | <i>Candidatus Solibacter usitatus</i> (65.07%)      | 81.30%  | 5502542 | 58.9 |
| 036 | Actinobacteria      | <i>Conexibacter woesei</i> (77.68%)                 | 84.10%  | 2800399 | 76.2 |
| 037 | Proteobacteria      | <i>Rhodospirillales</i> bacterium URHD0088 (68.10%) | 98.10%  | 4336571 | 65.9 |
| 038 | Actinobacteria      | <i>Patulibacter</i> sp. (53.10%)                    | 5.60%   | 414106  | 66.1 |
| 039 | Actinobacteria      | <i>Micromonospora carbonacea</i> (76.79%)           | 99.10%  | 5394202 | 72.7 |
| 040 | Verrucomicrobia     | <i>Chthoniobacter flavus</i> (63.07%)               | 90.70%  | 3571856 | 62.5 |
| 041 | Actinobacteria      | <i>Mycobacterium hassiacum</i> (99.73%)             | 94.40%  | 5323450 | 69.4 |
| 042 | Actinobacteria      | <i>Aeromicrobium marinum</i> (64.20%)               | 2.80%   | 426906  | 63.4 |
| 043 | Actinobacteria      | <i>Thermobifida fusca</i> (89.70%)                  | 4.70%   | 683055  | 64.6 |
| 044 | Chloroflexi         | <i>Oscillochloris trichoides</i> (64.28%)           | 94.40%  | 7806912 | 54.3 |
| 045 | Firmicutes          | <i>Symbiobacterium thermophilum</i> (61.91%)        | 98.10%  | 2949845 | 67.4 |
| 046 | Proteobacteria      | <i>Belnapia moabensis</i> (75.12%)                  | 70.10%  | 3974916 | 73   |
| 047 | Firmicutes          | <i>Paenibacillus ginsengihumi</i> (71.04%)          | 77.60%  | 4061821 | 57.5 |
| 048 | Actinobacteria      | <i>Conexibacter woesei</i> (65.63%)                 | 90.70%  | 3431598 | 71   |
| 049 | Proteobacteria      | <i>Bordetella petrii</i> (79.71%)                   | 100.00% | 3555599 | 66.9 |
| 050 | Actinobacteria      | <i>Dactylosporangium aurantiacum</i> (69.62%)       | 67.30%  | 4697130 | 71.9 |
| 051 | Proteobacteria      | <i>Bordetella petrii</i> (70.47%)                   | 97.20%  | 2897843 | 63   |
| 052 | Proteobacteria      | <i>Inquilinus limosus</i> (68.38%)                  | 89.70%  | 4573808 | 70.9 |

|     |                  |                                               |        |         |      |
|-----|------------------|-----------------------------------------------|--------|---------|------|
| 053 | Proteobacteria   | <i>Azospira oryzae</i> (69.66%)               | 98.10% | 2754323 | 66.6 |
| 054 | Actinobacteria   | <i>Thermobifida fusca</i> (83.85%)            | 72.90% | 4366661 | 72.3 |
| 055 | Gemmatimonadetes | Gemmatimonadetes bacterium KBS708 (62.89%)    | 13.10% | 348348  | 69.9 |
| 056 | Proteobacteria   | <i>Filomicrobium</i> sp. W (69.45%)           | 92.50% | 6047331 | 61.4 |
| 057 | Gemmatimonadetes | Gemmatimonadetes bacterium KBS708 (63.29%)    | 0.00%  | 550887  | 72.9 |
| 058 | Proteobacteria   | <i>Nitrosococcus halophilus</i> (58.61%)      | 96.30% | 4705754 | 61.8 |
| 059 | Proteobacteria   | <i>Bdellovibrio bacteriovorus</i> (59.65%)    | 98.10% | 3221967 | 54   |
| 060 | Actinobacteria   | <i>Jiangella alkaliphila</i> (67.19%)         | 87.90% | 3885222 | 74.6 |
| 061 | Proteobacteria   | <i>Bordetella petrii</i> (73.79%)             | 86.90% | 4177445 | 65.4 |
| 062 | Proteobacteria   | <i>Bordetella hinzii</i> (88.78%)             | 10.30% | 2327317 | 58.6 |
| 063 | Actinobacteria   | <i>Conexibacter woesei</i> (66.28%)           | 52.30% | 2633280 | 74.5 |
| 064 | Planctomycetes   | <i>Phycisphaera mikurensis</i> (62.04%)       | 95.30% | 3503091 | 62.2 |
| 065 | Proteobacteria   | <i>Methylocaldum szegediense</i> (64.91%)     | 81.30% | 4784654 | 67.4 |
| 066 | Proteobacteria   | <i>Kordiimonas gwangyangensis</i> (66.24%)    | 96.30% | 3271114 | 66.3 |
| 067 | Actinobacteria   | <i>Conexibacter woesei</i> (65.56%)           | 95.30% | 2054099 | 73.6 |
| 068 | Actinobacteria   | <i>Conexibacter woesei</i> (68.38%)           | 62.60% | 3463371 | 75.4 |
| 069 | Actinobacteria   | <i>Thermomonospora curvata</i> (100.00%)      | 0.00%  | 307003  | 68.8 |
| 070 | Gemmatimonadetes | Gemmatimonadetes bacterium KBS708 (60.99%)    | 62.60% | 3768004 | 70.9 |
| 071 | Gemmatimonadetes | Gemmatimonadetes bacterium KBS708 (60.81%)    | 95.30% | 3775846 | 70.5 |
| 072 | Firmicutes       | <i>Thermobacillus composti</i> (85.45%)       | 90.70% | 4670286 | 52.5 |
| 073 | Proteobacteria   | Alpha proteobacterium JLT2015 (63.50%)        | 96.30% | 3163780 | 67.4 |
| 074 | Actinobacteria   | <i>Thermobispora bispora</i> (98.23%)         | 56.10% | 4278955 | 71.5 |
| 075 | Planctomycetes   | <i>Phycisphaera mikurensis</i> (56.83%)       | 90.70% | 5808029 | 65.6 |
| 076 | Proteobacteria   | <i>Dongia</i> sp. URHE0060 (67.84%)           | 86.00% | 4029430 | 67   |
| 077 | Actinobacteria   | <i>Dactylosporangium aurantiacum</i> (71.26%) | 56.10% | 4497961 | 71.9 |
| 078 | Firmicutes       | Clostridiales bacterium PH28_bin88 (59.81%)   | 96.30% | 5949782 | 66.5 |
| 079 | Actinobacteria   | <i>Solirubrobacter soli</i> (79.83%)          | 56.10% | 3100520 | 71.4 |
| 080 | Firmicutes       | <i>Thermobacillus composti</i> (97.90%)       | 85.00% | 3685388 | 62   |

|     |                  |                                                 |        |          |      |
|-----|------------------|-------------------------------------------------|--------|----------|------|
| 081 | Chloroflexi      | <i>Sphaerobacter thermophilus</i> (98.63%)      | 70.10% | 6194966  | 68   |
| 082 | Verrucomicrobia  | <i>Chthoniobacter flavus</i> (65.84%)           | 84.10% | 3508425  | 59   |
| 083 | Gemmatimonadetes | Gemmatimonadetes bacterium KBS708 (60.07%)      | 86.90% | 6889575  | 66.4 |
| 084 | Actinobacteria   | <i>Pseudonocardia dioxanivorans</i> (75.84%)    | 96.30% | 6800216  | 73   |
| 085 | Actinobacteria   | <i>Solirubrobacter soli</i> (74.63%)            | 17.80% | 3171396  | 74.8 |
| 086 | Proteobacteria   | <i>Chelativorans</i> sp. J32 (79.09%)           | 15.90% | 5891029  | 56.3 |
| 087 | (Eukaryote)      |                                                 |        | 9375488  | 47.2 |
| 088 | Actinobacteria   | <i>Streptosporangium roseum</i> (72.39%)        | 15.90% | 4466683  | 75.2 |
| 089 | Firmicutes       | <i>Geobacillus thermodenitrificans</i> (99.57%) | 97.20% | 5252116  | 47.5 |
| 090 | Actinobacteria   | <i>Conexibacter woesei</i> (64.10%)             | 60.70% | 2924126  | 71.8 |
| 091 | Firmicutes       | <i>Thermobacillus composti</i> (77.65%)         | 27.10% | 1454691  | 63   |
| 092 | Firmicutes       | <i>Thermobacillus composti</i> (81.95%)         | 63.60% | 2691226  | 59.1 |
| 093 | Firmicutes       | <i>Cohnella laeviribosi</i> (72.51%)            | 25.20% | 690129   | 64.7 |
| 094 | Proteobacteria   | <i>Chelativorans</i> sp. J32 (78.42%)           | 39.30% | 4926609  | 62.1 |
| 095 | Proteobacteria   | <i>Sorangium cellulosum</i> (64.14%)            | 80.40% | 6077248  | 67.3 |
| 096 | Actinobacteria   | Marine actinobacterium MedAcidi-G2B (64.65%)    | 92.50% | 4855510  | 70.9 |
| 097 | Proteobacteria   | <i>Bdellovibrio bacteriovorus</i> (60.36%)      | 83.20% | 3053639  | 51.9 |
| 098 | Firmicutes       | <i>Thermobacillus composti</i> (77.91%)         | 5.60%  | 956669   | 67.3 |
| 099 | Firmicutes       | <i>Thermobacillus composti</i> (75.41%)         | 42.10% | 2418936  | 60.5 |
| 100 | Firmicutes       | <i>Bacillus smithii</i> (98.41%)                | 72.90% | 2463437  | 40.1 |
| 101 | Firmicutes       | <i>Bacillus thermoamylovorans</i> (73.66%)      | 98.10% | 8100266  | 41.2 |
| 102 | (Eukaryote)      |                                                 |        | 19527087 | 53.5 |
| 103 | Chloroflexi      | <i>Oscillochloris trichoides</i> (70.71%)       | 68.20% | 5738301  | 72.8 |
| 104 | Firmicutes       | <i>Thermobacillus composti</i> (79.28%)         | 25.20% | 2731397  | 53.1 |
| 105 | Proteobacteria   | <i>Oceanibaculum indicum</i> (65.75%)           | 75.70% | 4034044  | 63   |
| 106 | Verrucomicrobia  | <i>Pedosphaera parvula</i> (60.73%)             | 69.20% | 3894320  | 62.8 |
| 107 | (Eukaryote)      |                                                 |        | 23851678 | 35.7 |
| 108 | (Eukaryote)      |                                                 |        | 735159   | 60.6 |

|     |                |                                               |        |         |      |
|-----|----------------|-----------------------------------------------|--------|---------|------|
| 109 | (Eukaryote)    |                                               |        | 8110372 | 48   |
| 110 | (Eukaryote)    |                                               |        | 1329684 | 63.9 |
| 111 | Chloroflexi    | <i>Sphaerobacter thermophilus</i> (93.70%)    | 73.80% | 4433798 | 68.4 |
| 112 | (Eukaryote)    |                                               |        | 812611  | 56.8 |
| 113 | (Eukaryote)    |                                               |        | 859691  | 56.5 |
| 114 | Firmicutes     | <i>Thermobacillus composti</i> (77.10%)       | 97.20% | 3421115 | 53.2 |
| 115 | Planctomycetes | <i>Chthonomonas calidirosea</i> (61.68%)      | 51.40% | 3608883 | 66.8 |
| 116 | Firmicutes     | <i>Thermobacillus composti</i> (87.58%)       | 68.20% | 3497721 | 64.6 |
| 117 | Firmicutes     | <i>Bacillus thermoamylovorans</i> (92.80%)    | 12.10% | 5610467 | 32   |
| 118 | Proteobacteria | <i>Inquilius limosus</i> (71.99%)             | 96.30% | 4532508 | 67.2 |
| 119 | Firmicutes     | <i>Thermobacillus composti</i> (77.77%)       | 97.20% | 4323597 | 58   |
| 120 | Firmicutes     | <i>Cohnella laeviribosi</i> (99.07%)          | 96.30% | 4308453 | 57.7 |
| 121 | Firmicutes     | <i>Thermobacillus composti</i> (87.11%)       | 66.40% | 3755183 | 63.5 |
| 122 | Firmicutes     | <i>Brevibacillus thermoruber</i> (93.14%)     | 94.40% | 3863006 | 56.4 |
| 123 | Actinobacteria | <i>Thermobifida fusca</i> (99.85%)            | 88.80% | 3713674 | 67.5 |
| 124 | Actinobacteria | <i>Dactylosporangium aurantiacum</i> (73.64%) | 66.40% | 1804394 | 71.7 |
| 125 | Bacteroidetes  | <i>Niastella koreensis</i> (73.53%)           | 69.20% | 6057648 | 47.7 |
| 126 | Firmicutes     | <i>Brevibacillus panacihumi</i> (78.49%)      | 97.20% | 3731259 | 54.9 |
| 127 | Firmicutes     | <i>Bacillus alveayuensis</i> (78.86%)         | 59.80% | 1589753 | 39.2 |
| 128 | Firmicutes     | <i>Tuberibacillus calidus</i> (98.83%)        | 89.70% | 3411171 | 43.7 |
| 129 | Firmicutes     | <i>Thermobacillus composti</i> (79.48%)       | 97.20% | 3930229 | 58.3 |
| 130 | Firmicutes     | <i>Clostridium</i> sp. KNHs205 (66.32%)       | 95.30% | 4937026 | 36.3 |
| 131 | Firmicutes     | <i>Paenibacillus</i> sp. UNC451MF (61.65%)    | 93.50% | 5378712 | 53   |
| 132 | Firmicutes     | <i>Bacillus thermoamylovorans</i> (98.85%)    | 95.30% | 4581459 | 37.4 |
| 133 | Firmicutes     | <i>Ureibacillus thermosphaericus</i> (87.05%) | 99.10% | 4466128 | 39.7 |
| 134 | Firmicutes     | <i>Paenibacillus</i> sp. UNC451MF (68.48%)    | 98.10% | 4167101 | 50.2 |
| 135 | Firmicutes     | <i>Paenibacillus ginsengihumi</i> (99.22%)    | 99.10% | 5772385 | 57.5 |
| 136 | Firmicutes     | <i>Caldibacillus debilis</i> (98.62%)         | 97.20% | 3387941 | 51.1 |

|     |            |                                        |        |         |      |
|-----|------------|----------------------------------------|--------|---------|------|
| 137 | Firmicutes | <i>Tuberibacillus calidus</i> (73.41%) | 96.30% | 3447197 | 51.4 |
| 138 | Firmicutes | <i>Bacillus coagulans</i> (99.53%)     | 80.40% | 2803041 | 46.7 |

<sup>a</sup> Completeness was estimated by calculating the proportion of 107 single copy marker genes, which can be found in 95% of bacteria, that uniquely appear in each recovered genome.

<sup>b</sup> Here the phylum of this recovered genome is undetermined since its closest species, *Candidatus Saccharibacteria* bacterium, still do not have a phylum level taxonomic annotation.

<sup>c</sup> We did not attempt to resolve the recovered eukaryotic genomes since MaxBin was not designed to recover eukaryotic species, and the genomes of the eukaryotes may be highly fragmented. Completeness is also not measured for all recovered eukaryotic genomes. These eukaryotic genomes are also not involved in any downstream metatranscriptomics analysis.
