# Supplementary material for: Ionic Liquids Impact the Bioenergy Feedstock-Degrading Microbiome and Transcription of Enzymes Relevant to Polysaccharide Hydrolysis
Source: PubMed Central journal article supplement (PMC5155067; doi:10.1128/msystems.00120-16), 2016-12-13
Supplement: sys006162071st3.pdf [file sys006162071st3.pdf]

Table S3. The coverages and relative abundance ratios estimated for the genomes recovered from the metagenomes

| Bin | Phylum           | Genome coverages |        |         |        |        | Relative abundance ratio (%) |       |         |       |       |
|-----|------------------|------------------|--------|---------|--------|--------|------------------------------|-------|---------|-------|-------|
|     |                  | Inoculum         | 0% IL  | 0.5% IL | 1% IL  | 2% IL  | Inoculum                     | 0% IL | 0.5% IL | 1% IL | 2% IL |
| 001 | Proteobacteria   | 852.37           | 875.62 | 47.89   | 43.48  | 35.27  | 21.5%                        | 21.0% | 0.7%    | 1.4%  | 1.4%  |
| 002 | Proteobacteria   | 338.81           | 282.21 | 13.8    | 15.5   | 39.47  | 8.5%                         | 6.8%  | 0.2%    | 0.5%  | 1.6%  |
| 003 | Proteobacteria   | 330.7            | 244.62 | 2469.76 | 657.27 | 147.74 | 8.3%                         | 5.9%  | 38.1%   | 21.1% | 5.9%  |
| 004 | Bacteroidetes    | 187.66           | 272.17 | 121.87  | 8.6    | 8.52   | 4.7%                         | 6.5%  | 1.9%    | 0.3%  | 0.3%  |
| 005 | Chloroflexi      | 176.39           | 288.52 | 10.94   | 10.96  | 20.65  | 4.4%                         | 6.9%  | 0.2%    | 0.4%  | 0.8%  |
| 006 | Proteobacteria   | 130.7            | 187.93 | 1057.51 | 75.75  | 15.18  | 3.3%                         | 4.5%  | 16.3%   | 2.4%  | 0.6%  |
| 007 | Planctomycetes   | 119.4            | 216.43 | 5.31    | 6.21   | 14.84  | 3.0%                         | 5.2%  | 0.1%    | 0.2%  | 0.6%  |
| 008 | Proteobacteria   | 112.79           | 90.84  | 193.05  | 37.25  | 17.2   | 2.8%                         | 2.2%  | 3.0%    | 1.2%  | 0.7%  |
| 009 | Proteobacteria   | 102.23           | 148.69 | 25.47   | 19.35  | 18.11  | 2.6%                         | 3.6%  | 0.4%    | 0.6%  | 0.7%  |
| 010 | Actinobacteria   | 95.26            | 94.13  | 168.34  | 29.41  | 9.39   | 2.4%                         | 2.3%  | 2.6%    | 0.9%  | 0.4%  |
| 011 | Actinobacteria   | 94.6             | 46.84  | 6.54    | 6.61   | 19.43  | 2.4%                         | 1.1%  | 0.1%    | 0.2%  | 0.8%  |
| 012 | (unclassified)   | 83.3             | 9.81   | 4.09    | 3.95   | 10.45  | 2.1%                         | 0.2%  | 0.1%    | 0.1%  | 0.4%  |
| 013 | Gemmatimonadetes | 82.13            | 79.31  | 1.19    | 1.29   | 4.31   | 2.1%                         | 1.9%  | 0.0%    | 0.0%  | 0.2%  |
| 014 | Actinobacteria   | 78.01            | 64.68  | 27.31   | 13.14  | 17.1   | 2.0%                         | 1.5%  | 0.4%    | 0.4%  | 0.7%  |
| 015 | Proteobacteria   | 72.05            | 71.28  | 5.01    | 4.17   | 9.52   | 1.8%                         | 1.7%  | 0.1%    | 0.1%  | 0.4%  |
| 016 | Actinobacteria   | 70.04            | 76.77  | 34.14   | 9.15   | 5.1    | 1.8%                         | 1.8%  | 0.5%    | 0.3%  | 0.2%  |
| 017 | Actinobacteria   | 51.28            | 30.56  | 4.35    | 3.6    | 13.17  | 1.3%                         | 0.7%  | 0.1%    | 0.1%  | 0.5%  |
| 018 | Acidobacteria    | 47.93            | 40.72  | 1.93    | 2.21   | 5.86   | 1.2%                         | 1.0%  | 0.0%    | 0.1%  | 0.2%  |
| 019 | Actinobacteria   | 45.91            | 31.84  | 151.47  | 14.36  | 7.91   | 1.2%                         | 0.8%  | 2.3%    | 0.5%  | 0.3%  |
| 020 | (Eukaryote)      | 42.85            | 63.14  | 9.79    | 1.95   | 3.26   | 1.1%                         | 1.5%  | 0.2%    | 0.1%  | 0.1%  |
| 021 | Proteobacteria   | 41.37            | 38.85  | 22.28   | 3.01   | 5.83   | 1.0%                         | 0.9%  | 0.3%    | 0.1%  | 0.2%  |
| 022 | Actinobacteria   | 37.79            | 40.52  | 3.09    | 3.06   | 8.44   | 1.0%                         | 1.0%  | 0.0%    | 0.1%  | 0.3%  |
| 023 | Proteobacteria   | 30.62            | 23.84  | 14.14   | 3.76   | 2.94   | 0.8%                         | 0.6%  | 0.2%    | 0.1%  | 0.1%  |
| 024 | Planctomycetes   | 29.87            | 23.99  | 2.15    | 1.52   | 4.76   | 0.8%                         | 0.6%  | 0.0%    | 0.0%  | 0.2%  |

|     |                     |       |       |        |       |      |      |      |      |      |      |
|-----|---------------------|-------|-------|--------|-------|------|------|------|------|------|------|
| 025 | Proteobacteria      | 29.79 | 39.51 | 1.04   | 1.21  | 1.56 | 0.7% | 0.9% | 0.0% | 0.0% | 0.1% |
| 026 | Proteobacteria      | 29.44 | 19.38 | 0.86   | 1.03  | 1.71 | 0.7% | 0.5% | 0.0% | 0.0% | 0.1% |
| 027 | Chloroflexi         | 25.7  | 16.92 | 2.23   | 2.05  | 5.52 | 0.6% | 0.4% | 0.0% | 0.1% | 0.2% |
| 028 | Proteobacteria      | 25.25 | 43.61 | 0.46   | 0.45  | 1.15 | 0.6% | 1.0% | 0.0% | 0.0% | 0.0% |
| 029 | Actinobacteria      | 24.04 | 35.61 | 2.27   | 1.59  | 5.83 | 0.6% | 0.9% | 0.0% | 0.1% | 0.2% |
| 030 | Actinobacteria      | 23.89 | 16.77 | 1.44   | 1.18  | 4.12 | 0.6% | 0.4% | 0.0% | 0.0% | 0.2% |
| 031 | Chloroflexi         | 23.33 | 22.6  | 2.36   | 1.92  | 6.78 | 0.6% | 0.5% | 0.0% | 0.1% | 0.3% |
| 032 | Deinococcus-Thermus | 21.41 | 16.32 | 0.83   | 0.76  | 1.55 | 0.5% | 0.4% | 0.0% | 0.0% | 0.1% |
| 033 | Chloroflexi         | 20.72 | 16.08 | 1.32   | 1.23  | 3.1  | 0.5% | 0.4% | 0.0% | 0.0% | 0.1% |
| 034 | Planctomycetes      | 18.87 | 24.04 | 1.27   | 1.36  | 2.89 | 0.5% | 0.6% | 0.0% | 0.0% | 0.1% |
| 035 | Acidobacteria       | 18.2  | 18.1  | 0.4    | 0.35  | 0.86 | 0.5% | 0.4% | 0.0% | 0.0% | 0.0% |
| 036 | Actinobacteria      | 16.12 | 3.7   | 1.68   | 1.46  | 4.8  | 0.4% | 0.1% | 0.0% | 0.0% | 0.2% |
| 037 | Proteobacteria      | 15.22 | 22.88 | 0.49   | 0.55  | 1.03 | 0.4% | 0.5% | 0.0% | 0.0% | 0.0% |
| 038 | Actinobacteria      | 14.83 | 7.11  | 0.59   | 0.75  | 1.92 | 0.4% | 0.2% | 0.0% | 0.0% | 0.1% |
| 039 | Actinobacteria      | 14.49 | 12.66 | 0.35   | 0.27  | 0.4  | 0.4% | 0.3% | 0.0% | 0.0% | 0.0% |
| 040 | Verrucomicrobia     | 14.35 | 32.46 | 0.24   | 0.33  | 0.6  | 0.4% | 0.8% | 0.0% | 0.0% | 0.0% |
| 041 | Actinobacteria      | 13.74 | 10.95 | 34.93  | 4.62  | 2.42 | 0.3% | 0.3% | 0.5% | 0.1% | 0.1% |
| 042 | Actinobacteria      | 12.54 | 5.63  | 0.53   | 0.67  | 1.4  | 0.3% | 0.1% | 0.0% | 0.0% | 0.1% |
| 043 | Actinobacteria      | 12.1  | 9.56  | 0.84   | 0.78  | 1.92 | 0.3% | 0.2% | 0.0% | 0.0% | 0.1% |
| 044 | Chloroflexi         | 11.84 | 40.72 | 1.33   | 0.76  | 1.21 | 0.3% | 1.0% | 0.0% | 0.0% | 0.0% |
| 045 | Firmicutes          | 10.9  | 9.01  | 0.58   | 0.59  | 1.39 | 0.3% | 0.2% | 0.0% | 0.0% | 0.1% |
| 046 | Proteobacteria      | 10.73 | 11.11 | 0.54   | 0.53  | 1.13 | 0.3% | 0.3% | 0.0% | 0.0% | 0.0% |
| 047 | Firmicutes          | 10.61 | 9.07  | 7.93   | 1.02  | 1.53 | 0.3% | 0.2% | 0.1% | 0.0% | 0.1% |
| 048 | Actinobacteria      | 10.55 | 6.89  | 0.66   | 0.56  | 1.24 | 0.3% | 0.2% | 0.0% | 0.0% | 0.0% |
| 049 | Proteobacteria      | 9.03  | 8.71  | 189.65 | 18.74 | 1.34 | 0.2% | 0.2% | 2.9% | 0.6% | 0.1% |
| 050 | Actinobacteria      | 8.87  | 1.33  | 0.2    | 0.22  | 0.59 | 0.2% | 0.0% | 0.0% | 0.0% | 0.0% |
| 051 | Proteobacteria      | 8.85  | 12.77 | 0.41   | 0.41  | 0.97 | 0.2% | 0.3% | 0.0% | 0.0% | 0.0% |
| 052 | Proteobacteria      | 8.2   | 9.4   | 0.46   | 0.47  | 1.12 | 0.2% | 0.2% | 0.0% | 0.0% | 0.0% |

|     |                  |      |       |        |        |      |      |      |      |      |      |
|-----|------------------|------|-------|--------|--------|------|------|------|------|------|------|
| 053 | Proteobacteria   | 8.15 | 15.22 | 19.66  | 1.29   | 0.63 | 0.2% | 0.4% | 0.3% | 0.0% | 0.0% |
| 054 | Actinobacteria   | 8.02 | 16.7  | 0.61   | 0.51   | 0.49 | 0.2% | 0.4% | 0.0% | 0.0% | 0.0% |
| 055 | Gemmatimonadetes | 7.46 | 10.24 | 0.07   | 0.07   | 0.12 | 0.2% | 0.2% | 0.0% | 0.0% | 0.0% |
| 056 | Proteobacteria   | 7.3  | 7.35  | 0.81   | 0.37   | 0.8  | 0.2% | 0.2% | 0.0% | 0.0% | 0.0% |
| 057 | Gemmatimonadetes | 7.29 | 10.21 | 0.08   | 0.07   | 0.12 | 0.2% | 0.2% | 0.0% | 0.0% | 0.0% |
| 058 | Proteobacteria   | 7.09 | 5.43  | 0.28   | 0.28   | 0.39 | 0.2% | 0.1% | 0.0% | 0.0% | 0.0% |
| 059 | Proteobacteria   | 7.05 | 9.63  | 0.74   | 0.46   | 1.11 | 0.2% | 0.2% | 0.0% | 0.0% | 0.0% |
| 060 | Actinobacteria   | 6.95 | 15.73 | 0.43   | 0.36   | 1.1  | 0.2% | 0.4% | 0.0% | 0.0% | 0.0% |
| 061 | Proteobacteria   | 6.78 | 10.29 | 12.84  | 2.41   | 0.78 | 0.2% | 0.2% | 0.2% | 0.1% | 0.0% |
| 062 | Proteobacteria   | 6.67 | 7.81  | 12.32  | 4.62   | 1.09 | 0.2% | 0.2% | 0.2% | 0.1% | 0.0% |
| 063 | Actinobacteria   | 6.47 | 4.35  | 0.8    | 0.58   | 1.38 | 0.2% | 0.1% | 0.0% | 0.0% | 0.1% |
| 064 | Planctomycetes   | 6.31 | 14.27 | 0.32   | 0.34   | 0.74 | 0.2% | 0.3% | 0.0% | 0.0% | 0.0% |
| 065 | Proteobacteria   | 6.17 | 8.68  | 0.25   | 0.21   | 0.44 | 0.2% | 0.2% | 0.0% | 0.0% | 0.0% |
| 066 | Proteobacteria   | 5.71 | 4.89  | 4.45   | 0.91   | 0.28 | 0.1% | 0.1% | 0.1% | 0.0% | 0.0% |
| 067 | Actinobacteria   | 5.41 | 21.28 | 0.51   | 0.48   | 1.27 | 0.1% | 0.5% | 0.0% | 0.0% | 0.1% |
| 068 | Actinobacteria   | 5.38 | 6.82  | 0.6    | 0.46   | 1.16 | 0.1% | 0.2% | 0.0% | 0.0% | 0.0% |
| 069 | Actinobacteria   | 5.31 | 4.63  | 2.84   | 0.79   | 0.68 | 0.1% | 0.1% | 0.0% | 0.0% | 0.0% |
| 070 | Gemmatimonadetes | 5.26 | 4.87  | 0.16   | 0.17   | 0.35 | 0.1% | 0.1% | 0.0% | 0.0% | 0.0% |
| 071 | Gemmatimonadetes | 5.26 | 24.08 | 0.08   | 0.09   | 0.16 | 0.1% | 0.6% | 0.0% | 0.0% | 0.0% |
| 072 | Firmicutes       | 4.79 | 3.03  | 174.19 | 116.16 | 2.98 | 0.1% | 0.1% | 2.7% | 3.7% | 0.1% |
| 073 | Proteobacteria   | 4.51 | 1.58  | 19.67  | 8.81   | 3.3  | 0.1% | 0.0% | 0.3% | 0.3% | 0.1% |
| 074 | Actinobacteria   | 4.03 | 3.01  | 0.22   | 0.08   | 0.14 | 0.1% | 0.1% | 0.0% | 0.0% | 0.0% |
| 075 | Planctomycetes   | 3.92 | 4.31  | 0.15   | 0.13   | 0.32 | 0.1% | 0.1% | 0.0% | 0.0% | 0.0% |
| 076 | Proteobacteria   | 3.83 | 5.77  | 0.23   | 0.18   | 0.38 | 0.1% | 0.1% | 0.0% | 0.0% | 0.0% |
| 077 | Actinobacteria   | 3.61 | 1.07  | 0.14   | 0.13   | 0.27 | 0.1% | 0.0% | 0.0% | 0.0% | 0.0% |
| 078 | Firmicutes       | 3.57 | 4.66  | 0.08   | 0.08   | 0.16 | 0.1% | 0.1% | 0.0% | 0.0% | 0.0% |
| 079 | Actinobacteria   | 3.53 | 2.33  | 0.29   | 0.21   | 0.68 | 0.1% | 0.1% | 0.0% | 0.0% | 0.0% |
| 080 | Firmicutes       | 3.46 | 2.42  | 165.85 | 95.91  | 1.3  | 0.1% | 0.1% | 2.6% | 3.1% | 0.1% |

|     |                  |      |      |        |       |        |      |      |      |      |      |
|-----|------------------|------|------|--------|-------|--------|------|------|------|------|------|
| 081 | Chloroflexi      | 3.38 | 3.1  | 0.45   | 0.21  | 0.51   | 0.1% | 0.1% | 0.0% | 0.0% | 0.0% |
| 082 | Verrucomicrobia  | 3.29 | 5.3  | 0.57   | 0.24  | 0.39   | 0.1% | 0.1% | 0.0% | 0.0% | 0.0% |
| 083 | Gemmatimonadetes | 3.21 | 2.83 | 0.1    | 0.11  | 0.29   | 0.1% | 0.1% | 0.0% | 0.0% | 0.0% |
| 084 | Actinobacteria   | 3.17 | 2.9  | 5.89   | 0.62  | 0.65   | 0.1% | 0.1% | 0.1% | 0.0% | 0.0% |
| 085 | Actinobacteria   | 3.13 | 2.06 | 0.28   | 0.2   | 0.62   | 0.1% | 0.0% | 0.0% | 0.0% | 0.0% |
| 086 | Proteobacteria   | 3.13 | 3.18 | 0.86   | 0.29  | 0.41   | 0.1% | 0.1% | 0.0% | 0.0% | 0.0% |
| 087 | (Eukaryote)      | 3.13 | 3.81 | 0.25   | 0.16  | 0.32   | 0.1% | 0.1% | 0.0% | 0.0% | 0.0% |
| 088 | Actinobacteria   | 2.78 | 3.01 | 0.2    | 0.07  | 0.12   | 0.1% | 0.1% | 0.0% | 0.0% | 0.0% |
| 089 | Firmicutes       | 2.75 | 1.18 | 55.77  | 11.19 | 1.64   | 0.1% | 0.0% | 0.9% | 0.4% | 0.1% |
| 090 | Actinobacteria   | 2.73 | 3.27 | 0.22   | 0.2   | 0.6    | 0.1% | 0.1% | 0.0% | 0.0% | 0.0% |
| 091 | Firmicutes       | 2.73 | 3.22 | 0.12   | 0.1   | 0.31   | 0.1% | 0.1% | 0.0% | 0.0% | 0.0% |
| 092 | Firmicutes       | 2.7  | 3.12 | 0.15   | 0.12  | 0.29   | 0.1% | 0.1% | 0.0% | 0.0% | 0.0% |
| 093 | Firmicutes       | 2.57 | 2.55 | 0.06   | 0.07  | 0.21   | 0.1% | 0.1% | 0.0% | 0.0% | 0.0% |
| 094 | Proteobacteria   | 2.45 | 2.84 | 0.21   | 0.12  | 0.27   | 0.1% | 0.1% | 0.0% | 0.0% | 0.0% |
| 095 | Proteobacteria   | 2.37 | 3.66 | 0.06   | 0.07  | 0.18   | 0.1% | 0.1% | 0.0% | 0.0% | 0.0% |
| 096 | Actinobacteria   | 2.24 | 5.14 | 0.18   | 0.16  | 0.42   | 0.1% | 0.1% | 0.0% | 0.0% | 0.0% |
| 097 | Proteobacteria   | 2.23 | 2.69 | 1.81   | 0.16  | 0.26   | 0.1% | 0.1% | 0.0% | 0.0% | 0.0% |
| 098 | Firmicutes       | 2.23 | 3.02 | 0.07   | 0.07  | 0.21   | 0.1% | 0.1% | 0.0% | 0.0% | 0.0% |
| 099 | Firmicutes       | 2.21 | 3.04 | 0.06   | 0.07  | 0.19   | 0.1% | 0.1% | 0.0% | 0.0% | 0.0% |
| 100 | Firmicutes       | 2.12 | 1    | 126.58 | 241.2 | 165.95 | 0.1% | 0.0% | 2.0% | 7.7% | 6.6% |
| 101 | Firmicutes       | 2.12 | 0.82 | 5.4    | 4.01  | 2.75   | 0.1% | 0.0% | 0.1% | 0.1% | 0.1% |
| 102 | (Eukaryote)      | 2.04 | 2.96 | 0.06   | 0.03  | 0.11   | 0.1% | 0.1% | 0.0% | 0.0% | 0.0% |
| 103 | Chloroflexi      | 2.04 | 6.99 | 0.16   | 0.19  | 0.45   | 0.1% | 0.2% | 0.0% | 0.0% | 0.0% |
| 104 | Firmicutes       | 2.03 | 2.95 | 0.15   | 0.12  | 0.23   | 0.1% | 0.1% | 0.0% | 0.0% | 0.0% |
| 105 | Proteobacteria   | 2.01 | 5.09 | 0.11   | 0.09  | 0.15   | 0.1% | 0.1% | 0.0% | 0.0% | 0.0% |
| 106 | Verrucomicrobia  | 1.94 | 3.37 | 0.16   | 0.09  | 0.2    | 0.0% | 0.1% | 0.0% | 0.0% | 0.0% |
| 107 | (Eukaryote)      | 1.92 | 2.58 | 0.09   | 0.06  | 0.12   | 0.0% | 0.1% | 0.0% | 0.0% | 0.0% |
| 108 | (Eukaryote)      | 1.91 | 1.84 | 0.13   | 0.1   | 0.33   | 0.0% | 0.0% | 0.0% | 0.0% | 0.0% |

|     |                |      |      |        |        |        |      |      |      |       |       |
|-----|----------------|------|------|--------|--------|--------|------|------|------|-------|-------|
| 109 | (Eukaryote)    | 1.87 | 1.82 | 0.16   | 0.1    | 0.36   | 0.0% | 0.0% | 0.0% | 0.0%  | 0.0%  |
| 110 | (Eukaryote)    | 1.86 | 1.64 | 0.17   | 0.11   | 0.34   | 0.0% | 0.0% | 0.0% | 0.0%  | 0.0%  |
| 111 | Chloroflexi    | 1.86 | 2.15 | 0.19   | 0.12   | 0.33   | 0.0% | 0.1% | 0.0% | 0.0%  | 0.0%  |
| 112 | (Eukaryote)    | 1.84 | 1.74 | 0.14   | 0.11   | 0.38   | 0.0% | 0.0% | 0.0% | 0.0%  | 0.0%  |
| 113 | (Eukaryote)    | 1.82 | 1.73 | 0.14   | 0.1    | 0.35   | 0.0% | 0.0% | 0.0% | 0.0%  | 0.0%  |
| 114 | Firmicutes     | 1.45 | 2.17 | 243.63 | 178.61 | 1.37   | 0.0% | 0.1% | 3.8% | 5.7%  | 0.1%  |
| 115 | Planctomycetes | 1.35 | 3.98 | 0.04   | 0.04   | 0.09   | 0.0% | 0.1% | 0.0% | 0.0%  | 0.0%  |
| 116 | Firmicutes     | 1.27 | 1.48 | 46.81  | 1.04   | 0.18   | 0.0% | 0.0% | 0.7% | 0.0%  | 0.0%  |
| 117 | Firmicutes     | 1.27 | 0.65 | 5.05   | 3.73   | 2.47   | 0.0% | 0.0% | 0.1% | 0.1%  | 0.1%  |
| 118 | Proteobacteria | 1.01 | 1.49 | 81.14  | 25.14  | 0.42   | 0.0% | 0.0% | 1.3% | 0.8%  | 0.0%  |
| 119 | Firmicutes     | 0.97 | 0.89 | 26.61  | 3.23   | 0.13   | 0.0% | 0.0% | 0.4% | 0.1%  | 0.0%  |
| 120 | Firmicutes     | 0.9  | 0.48 | 47.86  | 35.84  | 5.82   | 0.0% | 0.0% | 0.7% | 1.2%  | 0.2%  |
| 121 | Firmicutes     | 0.87 | 0.47 | 9.4    | 0.42   | 0.15   | 0.0% | 0.0% | 0.1% | 0.0%  | 0.0%  |
| 122 | Firmicutes     | 0.84 | 0.44 | 288.17 | 450.93 | 386.64 | 0.0% | 0.0% | 4.4% | 14.5% | 15.3% |
| 123 | Actinobacteria | 0.81 | 0.5  | 5.33   | 2.65   | 0.24   | 0.0% | 0.0% | 0.1% | 0.1%  | 0.0%  |
| 124 | Actinobacteria | 0.78 | 6.22 | 0.04   | 0.05   | 0.09   | 0.0% | 0.1% | 0.0% | 0.0%  | 0.0%  |
| 125 | Bacteroidetes  | 0.77 | 3.68 | 0.27   | 0.02   | 0.03   | 0.0% | 0.1% | 0.0% | 0.0%  | 0.0%  |
| 126 | Firmicutes     | 0.65 | 0.48 | 10.55  | 25.78  | 14.72  | 0.0% | 0.0% | 0.2% | 0.8%  | 0.6%  |
| 127 | Firmicutes     | 0.64 | 0.69 | 231.09 | 544.08 | 973.49 | 0.0% | 0.0% | 3.6% | 17.5% | 38.6% |
| 128 | Firmicutes     | 0.54 | 0.41 | 0.25   | 0.21   | 0.36   | 0.0% | 0.0% | 0.0% | 0.0%  | 0.0%  |
| 129 | Firmicutes     | 0.52 | 0.39 | 35.53  | 4.96   | 0.11   | 0.0% | 0.0% | 0.5% | 0.2%  | 0.0%  |
| 130 | Firmicutes     | 0.39 | 0.21 | 22.32  | 53.55  | 12.23  | 0.0% | 0.0% | 0.3% | 1.7%  | 0.5%  |
| 131 | Firmicutes     | 0.34 | 0.2  | 7.08   | 1.27   | 0.11   | 0.0% | 0.0% | 0.1% | 0.0%  | 0.0%  |
| 132 | Firmicutes     | 0.25 | 0.38 | 90.58  | 143.74 | 328.41 | 0.0% | 0.0% | 1.4% | 4.6%  | 13.0% |
| 133 | Firmicutes     | 0.22 | 0.2  | 20.27  | 29.89  | 62.32  | 0.0% | 0.0% | 0.3% | 1.0%  | 2.5%  |
| 134 | Firmicutes     | 0.08 | 0.07 | 25.36  | 45.31  | 0.09   | 0.0% | 0.0% | 0.4% | 1.5%  | 0.0%  |
| 135 | Firmicutes     | 0.07 | 0.04 | 0.58   | 15.25  | 0.06   | 0.0% | 0.0% | 0.0% | 0.5%  | 0.0%  |
| 136 | Firmicutes     | 0.02 | 0.02 | 0.18   | 31.68  | 0.11   | 0.0% | 0.0% | 0.0% | 1.0%  | 0.0%  |

|     |            |      |      |      |      |       |      |      |      |      |      |
|-----|------------|------|------|------|------|-------|------|------|------|------|------|
| 137 | Firmicutes | 0.01 | 0.29 | 0.21 | 0.38 | 0.22  | 0.0% | 0.0% | 0.0% | 0.0% | 0.0% |
| 138 | Firmicutes | 0.01 | 0.01 | 1.91 | 0.4  | 22.57 | 0.0% | 0.0% | 0.0% | 0.0% | 0.9% |
