# Supplementary material for: Ionic Liquids Impact the Bioenergy Feedstock-Degrading Microbiome and Transcription of Enzymes Relevant to Polysaccharide Hydrolysis
Source: PubMed Central journal article supplement (PMC5155067; doi:10.1128/msystems.00120-16), 2016-12-13
Supplement: sys006162071st4.pdf [file sys006162071st4.pdf]

Table S4. Mapping rates of genomic and transcriptomic sequencing reads against the co-assembled metagenome

|                          | Samples  | Mapping Rate |
|--------------------------|----------|--------------|
| Metagenomic reads        | Inoculum | 97.06%       |
|                          | 0% IL    | 97.22%       |
|                          | 0.5% IL  | 96.71%       |
|                          | 1% IL    | 96.04%       |
|                          | 2% IL    | 94.36%       |
| Metatranscriptomic reads | Inoculum | 91.72%       |
|                          | 0% IL    | 92.14%       |
|                          | 0.5% IL  | 96.95%       |
|                          | 1% IL    | 97.68%       |
|                          | 2% IL    | 94.58%       |
