# Supplementary material for: Ionic Liquids Impact the Bioenergy Feedstock-Degrading Microbiome and Transcription of Enzymes Relevant to Polysaccharide Hydrolysis
Source: PubMed Central journal article supplement (PMC5155067; doi:10.1128/msystems.00120-16), 2016-12-13
Supplement: sys006162071st5.pdf [file sys006162071st5.pdf]

Table S5. Shannon diversity, richness and Pielou's evenness values for microbial communities by different treatments.

|          | Shannon | Richness | Evenness |
|----------|---------|----------|----------|
| Inoculum | 2.93    | 117      | 0.62     |
| 0% IL    | 2.97    | 190      | 0.57     |
| 0.5% IL  | 2.71    | 114      | 0.57     |
| 1% IL    | 2.17    | 113      | 0.46     |
| 2% IL    | 1.74    | 143      | 0.35     |
