# Supplementary material for: Ionic Liquids Impact the Bioenergy Feedstock-Degrading Microbiome and Transcription of Enzymes Relevant to Polysaccharide Hydrolysis
Source: PubMed Central journal article supplement (PMC5155067; doi:10.1128/msystems.00120-16), 2016-12-13
Supplement: sys006162071st6.pdf [file sys006162071st6.pdf]

Table S6. Summarized RPKM values for the genome bins.

|     |                  | Inoculum         | 0% IL     | 0.5% IL   | 1% IL    | 2% IL    |
|-----|------------------|------------------|-----------|-----------|----------|----------|
| 001 | Proteobacteria   | 166782.49        | 173878.89 | 7304.68   | 1512.42  | 6200.93  |
| 002 | Proteobacteria   | 35526.28         | 30206.95  | 962.82    | 640.00   | 10952.59 |
| 003 | Proteobacteria   | 23829.19         | 17977.87  | 213559.52 | 51675.57 | 34338.97 |
| 004 | Bacteroidetes    | 76907.20         | 66155.43  | 92230.18  | 638.76   | 411.44   |
| 005 | Chloroflexi      | 110856.28        | 153688.24 | 890.79    | 535.75   | 3765.55  |
| 006 | Proteobacteria   | 21359.45         | 35243.91  | 279113.90 | 7884.95  | 3681.29  |
| 007 | Planctomycetes   | 8650.10          | 17172.62  | 764.77    | 438.70   | 7104.08  |
| 008 | Proteobacteria   | 39025.24         | 18011.05  | 72936.34  | 3637.03  | 4552.50  |
| 009 | Proteobacteria   | 94722.48         | 102766.90 | 1618.39   | 1202.40  | 5864.00  |
| 010 | Actinobacteria   | 36239.34         | 53882.00  | 219238.40 | 4560.51  | 6868.54  |
| 011 | Actinobacteria   | 18006.55         | 7921.03   | 489.04    | 660.49   | 7584.30  |
| 012 | (unclassified)   | 1141.46          | 119.60    | 47.04     | 193.57   | 1117.14  |
| 013 | Gemmatimonadetes | 8074.74          | 9054.15   | 110.66    | 94.46    | 2198.89  |
| 014 | Actinobacteria   | 17329.86         | 13394.83  | 4357.99   | 2514.85  | 6912.75  |
| 015 | Proteobacteria   | 65443.70         | 29284.13  | 457.52    | 294.60   | 2789.44  |
| 016 | Actinobacteria   | 27785.96         | 44570.24  | 8749.04   | 1897.19  | 3982.17  |
| 017 | Actinobacteria   | 11090.08         | 6783.82   | 76.92     | 81.13    | 2879.49  |
| 018 | Acidobacteria    | 13423.18         | 10607.79  | 102.27    | 61.31    | 1440.05  |
| 019 | Actinobacteria   | 15371.47         | 7174.61   | 60822.81  | 7299.44  | 2022.29  |
| 020 | (Eukaryote)      | N/A <sup>a</sup> | N/A       | N/A       | N/A      | N/A      |
| 021 | Proteobacteria   | 25373.22         | 19580.25  | 23485.31  | 650.34   | 2063.98  |
| 022 | Actinobacteria   | 682.26           | 978.03    | 95.78     | 93.69    | 1904.87  |
| 023 | Proteobacteria   | 6550.33          | 5425.00   | 5441.97   | 264.98   | 2236.11  |
| 024 | Planctomycetes   | 18487.63         | 12222.14  | 144.46    | 107.09   | 1280.91  |
| 025 | Proteobacteria   | 7407.22          | 7930.81   | 81.07     | 45.55    | 173.68   |

|     |                         |          |          |          |          |         |
|-----|-------------------------|----------|----------|----------|----------|---------|
| 026 | Proteobacteria          | 11040.73 | 6862.36  | 27.73    | 26.84    | 170.82  |
| 027 | Chloroflexi             | 5864.19  | 3685.06  | 173.98   | 118.43   | 2282.14 |
| 028 | Proteobacteria          | 30105.24 | 54050.27 | 45.68    | 26.21    | 754.67  |
| 029 | Actinobacteria          | 1033.54  | 1831.07  | 50.88    | 36.95    | 1396.71 |
| 030 | Actinobacteria          | 2374.55  | 1813.98  | 74.53    | 40.91    | 1294.98 |
| 031 | Chloroflexi             | 10706.11 | 12596.71 | 149.91   | 132.94   | 2647.89 |
| 032 | Deinococcus-<br>Thermus | 1099.10  | 1222.48  | 27.03    | 15.74    | 387.36  |
| 033 | Chloroflexi             | 74427.12 | 49584.43 | 82.86    | 88.81    | 376.02  |
| 034 | Planctomycetes          | 46833.18 | 54338.30 | 46.77    | 55.57    | 437.59  |
| 035 | Acidobacteria           | 33405.37 | 31320.19 | 148.36   | 70.37    | 440.70  |
| 036 | Actinobacteria          | 966.85   | 206.05   | 35.63    | 26.50    | 778.65  |
| 037 | Proteobacteria          | 13867.91 | 24032.33 | 40.06    | 28.02    | 326.04  |
| 038 | Actinobacteria          | 1210.36  | 338.53   | 7.21     | 11.61    | 101.05  |
| 039 | Actinobacteria          | 1465.67  | 1704.06  | 86.21    | 52.86    | 367.47  |
| 040 | Verrucomicrobia         | 3742.84  | 6442.78  | 14.02    | 15.88    | 111.67  |
| 041 | Actinobacteria          | 5756.26  | 5375.91  | 55617.00 | 3322.30  | 1956.22 |
| 042 | Actinobacteria          | 548.94   | 214.64   | 13.11    | 26.29    | 51.66   |
| 043 | Actinobacteria          | 893.81   | 865.12   | 33.82    | 21.08    | 97.09   |
| 044 | Chloroflexi             | 29304.86 | 73324.08 | 56.32    | 66.57    | 177.34  |
| 045 | Firmicutes              | 2467.29  | 2354.14  | 48.32    | 24.34    | 339.97  |
| 046 | Proteobacteria          | 1480.36  | 1671.65  | 33.06    | 16.91    | 476.46  |
| 047 | Firmicutes              | 7251.90  | 8041.24  | 7573.66  | 436.91   | 142.46  |
| 048 | Actinobacteria          | 1047.49  | 883.62   | 53.01    | 22.89    | 456.84  |
| 049 | Proteobacteria          | 1262.59  | 1310.89  | 73647.40 | 68773.99 | 398.29  |
| 050 | Actinobacteria          | 1599.39  | 378.10   | 33.13    | 14.69    | 341.94  |
| 051 | Proteobacteria          | 10624.28 | 12678.36 | 23.46    | 26.84    | 123.44  |
| 052 | Proteobacteria          | 2274.04  | 2175.75  | 36.62    | 27.22    | 565.75  |

|     |                  |         |          |          |           |         |
|-----|------------------|---------|----------|----------|-----------|---------|
| 053 | Proteobacteria   | 966.08  | 2000.58  | 4039.70  | 57.30     | 127.02  |
| 054 | Actinobacteria   | 3608.75 | 10355.82 | 107.15   | 38.66     | 259.46  |
| 055 | Gemmatimonadetes | 162.13  | 160.00   | 0.71     | 0.00      | 8.91    |
| 056 | Proteobacteria   | 6037.23 | 6430.12  | 418.00   | 45.17     | 216.94  |
| 057 | Gemmatimonadetes | 33.34   | 58.68    | 0.52     | 0.00      | 6.11    |
| 058 | Proteobacteria   | 1726.12 | 1197.57  | 14.87    | 7.35      | 49.43   |
| 059 | Proteobacteria   | 867.64  | 996.95   | 642.26   | 3791.82   | 1666.33 |
| 060 | Actinobacteria   | 521.20  | 1214.42  | 15.60    | 4.18      | 294.27  |
| 061 | Proteobacteria   | 5990.29 | 5664.13  | 18949.98 | 3425.77   | 208.64  |
| 062 | Proteobacteria   | 1969.44 | 1563.88  | 4431.12  | 12096.72  | 142.65  |
| 063 | Actinobacteria   | 108.74  | 89.92    | 25.35    | 15.89     | 246.44  |
| 064 | Planctomycetes   | 1745.67 | 3658.48  | 8.95     | 12.24     | 83.80   |
| 065 | Proteobacteria   | 647.64  | 1305.02  | 21.37    | 17.38     | 183.10  |
| 066 | Proteobacteria   | 1986.74 | 1736.30  | 2469.75  | 49.13     | 69.27   |
| 067 | Actinobacteria   | 184.45  | 796.74   | 8.98     | 11.95     | 220.77  |
| 068 | Actinobacteria   | 340.45  | 436.85   | 14.00    | 12.24     | 243.50  |
| 069 | Actinobacteria   | 483.68  | 306.42   | 190.22   | 28.04     | 27.37   |
| 070 | Gemmatimonadetes | 5820.44 | 5083.48  | 30.23    | 9.04      | 122.61  |
| 071 | Gemmatimonadetes | 496.84  | 2899.16  | 10.05    | 3.93      | 57.91   |
| 072 | Firmicutes       | 417.85  | 380.54   | 57336.82 | 100632.33 | 321.46  |
| 073 | Proteobacteria   | 3776.61 | 628.47   | 3705.03  | 650.49    | 1060.96 |
| 074 | Actinobacteria   | 772.47  | 660.00   | 27.60    | 7.96      | 108.07  |
| 075 | Planctomycetes   | 1806.41 | 2281.63  | 50.80    | 16.85     | 195.71  |
| 076 | Proteobacteria   | 1394.28 | 2298.46  | 22.64    | 9.74      | 135.25  |
| 077 | Actinobacteria   | 725.90  | 361.12   | 44.61    | 13.91     | 241.96  |
| 078 | Firmicutes       | 3518.54 | 5746.19  | 17.72    | 7.09      | 65.59   |
| 079 | Actinobacteria   | 346.18  | 227.77   | 10.19    | 6.47      | 191.36  |
| 080 | Firmicutes       | 294.71  | 200.65   | 29724.17 | 27648.43  | 213.55  |

|     |                  |         |         |         |           |           |
|-----|------------------|---------|---------|---------|-----------|-----------|
| 081 | Chloroflexi      | 4093.47 | 4439.99 | 514.01  | 130.08    | 928.08    |
| 082 | Verrucomicrobia  | 676.73  | 878.30  | 40.87   | 27.21     | 64.39     |
| 083 | Gemmatimonadetes | 1193.99 | 1117.05 | 8.80    | 4.46      | 130.31    |
| 084 | Actinobacteria   | 4651.87 | 4038.40 | 9954.43 | 88.21     | 494.25    |
| 085 | Actinobacteria   | 112.72  | 83.55   | 6.38    | 3.48      | 132.84    |
| 086 | Proteobacteria   | 4832.67 | 4551.80 | 1214.56 | 179.61    | 435.05    |
| 087 | (Eukaryote)      | N/A     | N/A     | N/A     | N/A       | N/A       |
| 088 | Actinobacteria   | 387.21  | 569.04  | 24.14   | 3.29      | 57.77     |
| 089 | Firmicutes       | 2723.90 | 335.04  | 5226.44 | 1778.56   | 332.91    |
| 090 | Actinobacteria   | 149.09  | 211.61  | 9.84    | 6.36      | 188.86    |
| 091 | Firmicutes       | 225.45  | 286.09  | 4.71    | 0.97      | 16.49     |
| 092 | Firmicutes       | 461.53  | 707.20  | 7.63    | 4.99      | 26.77     |
| 093 | Firmicutes       | 881.46  | 615.33  | 3.95    | 1.63      | 20.51     |
| 094 | Proteobacteria   | 2340.81 | 3367.80 | 104.61  | 59.10     | 247.13    |
| 095 | Proteobacteria   | 865.29  | 1049.10 | 5.76    | 2.73      | 72.52     |
| 096 | Actinobacteria   | 597.68  | 1957.77 | 9.97    | 5.82      | 113.69    |
| 097 | Proteobacteria   | 457.52  | 554.12  | 289.97  | 4.12      | 37.49     |
| 098 | Firmicutes       | 121.16  | 203.21  | 1.22    | 0.72      | 20.97     |
| 099 | Firmicutes       | 411.26  | 332.71  | 2.80    | 0.95      | 13.76     |
| 100 | Firmicutes       | 51.87   | 44.09   | 1958.33 | 102096.85 | 140205.43 |
| 101 | Firmicutes       | 289.55  | 249.58  | 579.60  | 1970.10   | 7307.44   |
| 102 | (Eukaryote)      | N/A     | N/A     | N/A     | N/A       | N/A       |
| 103 | Chloroflexi      | 415.34  | 1172.91 | 9.17    | 9.32      | 123.29    |
| 104 | Firmicutes       | 517.21  | 912.28  | 6.60    | 1.78      | 12.72     |
| 105 | Proteobacteria   | 728.87  | 1219.16 | 11.77   | 2.59      | 39.41     |
| 106 | Verrucomicrobia  | 2626.11 | 6674.49 | 252.30  | 13.33     | 54.61     |
| 107 | (Eukaryote)      | N/A     | N/A     | N/A     | N/A       | N/A       |
| 108 | (Eukaryote)      | N/A     | N/A     | N/A     | N/A       | N/A       |

|     |                |         |         |          |           |           |
|-----|----------------|---------|---------|----------|-----------|-----------|
| 109 | (Eukaryote)    | N/A     | N/A     | N/A      | N/A       | N/A       |
| 110 | (Eukaryote)    | N/A     | N/A     | N/A      | N/A       | N/A       |
| 111 | Chloroflexi    | 850.13  | 964.96  | 26.51    | 14.70     | 217.55    |
| 112 | (Eukaryote)    | N/A     | N/A     | N/A      | N/A       | N/A       |
| 113 | (Eukaryote)    | N/A     | N/A     | N/A      | N/A       | N/A       |
| 114 | Firmicutes     | 263.56  | 470.89  | 61497.94 | 177435.29 | 164.16    |
| 115 | Planctomycetes | 1090.24 | 3147.50 | 5.99     | 0.00      | 20.47     |
| 116 | Firmicutes     | 166.93  | 403.41  | 21565.53 | 282.15    | 36.28     |
| 117 | Firmicutes     | 419.34  | 364.44  | 250.62   | 2269.72   | 11035.83  |
| 118 | Proteobacteria | 552.57  | 453.03  | 8359.32  | 2023.89   | 170.20    |
| 119 | Firmicutes     | 348.70  | 398.68  | 2563.11  | 625.27    | 21.04     |
| 120 | Firmicutes     | 15.52   | 12.96   | 1533.52  | 2120.01   | 1357.08   |
| 121 | Firmicutes     | 152.90  | 103.60  | 4105.48  | 20.74     | 39.63     |
| 122 | Firmicutes     | 25.45   | 74.16   | 9727.14  | 52760.33  | 34363.81  |
| 123 | Actinobacteria | 326.56  | 182.97  | 7763.75  | 7525.30   | 301.32    |
| 124 | Actinobacteria | 162.37  | 2746.39 | 4.89     | 0.93      | 23.00     |
| 125 | Bacteroidetes  | 1759.71 | 5152.19 | 425.38   | 6.63      | 6.00      |
| 126 | Firmicutes     | 21.77   | 22.93   | 330.62   | 2623.72   | 985.69    |
| 127 | Firmicutes     | 347.59  | 220.53  | 8837.61  | 146184.44 | 519513.72 |
| 128 | Firmicutes     | 26.87   | 43.23   | 6.66     | 39.96     | 8.20      |
| 129 | Firmicutes     | 93.72   | 121.70  | 9749.02  | 1612.44   | 13.41     |
| 130 | Firmicutes     | 19.12   | 5.55    | 499.39   | 50964.11  | 611.31    |
| 131 | Firmicutes     | 36.91   | 37.74   | 2248.17  | 74.00     | 4.61      |
| 132 | Firmicutes     | 6.79    | 15.02   | 2624.72  | 211736.00 | 299817.60 |
| 133 | Firmicutes     | 24.38   | 15.83   | 579.29   | 31954.52  | 33359.04  |
| 134 | Firmicutes     | 6.85    | 6.28    | 4444.75  | 71975.65  | 17.90     |
| 135 | Firmicutes     | 17.18   | 4.83    | 70.05    | 5556.16   | 8.22      |
| 136 | Firmicutes     | 0.00    | 0.00    | 7.78     | 61765.55  | 31.40     |

|                       |            |           |           |           |            |         |
|-----------------------|------------|-----------|-----------|-----------|------------|---------|
| 137                   | Firmicutes | 0.85      | 2.92      | 7.59      | 136.12     | 166.21  |
| 138                   | Firmicutes | 0.00      | 0.00      | 14.44     | 7.26       | 796.74  |
| Unbinned <sup>b</sup> |            | 662413.97 | 714711.19 | 609576.20 | 1295559.72 | 1369481 |

<sup>a</sup> The RPKM values of eukaryotic bins are ignored since MaxBin was not designed to bin eukaryotes, and the RPKM estimation of eukaryotic genes may be biased using our metatranscriptomics analysis pipeline due to the exon-intron structure of eukaryotic organisms.

<sup>b</sup> The RPKM values of unbinned genes are summarized here. The summed RPKM values may include unbinned eukaryotic genes and may be over-estimated.
