# Supplementary material for: Ionic Liquids Impact the Bioenergy Feedstock-Degrading Microbiome and Transcription of Enzymes Relevant to Polysaccharide Hydrolysis
Source: PubMed Central journal article supplement (PMC5155067; doi:10.1128/msystems.00120-16), 2016-12-13
Supplement: sys006162071st7.pdf [file sys006162071st7.pdf]

Table S7. Top 5 expressed genes in Bin 127 for all five samples.

| Gene              | Gene product                                                     | RPKM     |          |          |          |          |
|-------------------|------------------------------------------------------------------|----------|----------|----------|----------|----------|
|                   |                                                                  | Inoculum | 0% IL    | 0.5% IL  | 1% IL    | 2% IL    |
| scaffold_119436_3 | hypothetical protein                                             | 342.7457 | 216.213  | 2420.401 | 13730.02 | 132053.3 |
| scaffold_172955_4 | Membrane protein TerC, possibly involved in tellurium resistance | 1.594824 | 1.611396 | 451.1241 | 16632.19 | 72931.25 |
| scaffold_42143_5  | Arabinose efflux permease                                        | 0        | 0        | 176.8868 | 9105.197 | 43112.1  |
| scaffold_218866_2 | Isocitrate lyase                                                 | 0        | 0        | 1029.381 | 20086.59 | 36461.34 |
| scaffold_38470_1  | hypothetical protein (ABC transporter permease)                  | 0        | 0        | 526.4152 | 8014.849 | 31638.67 |
