# Supplementary material for: Ionic Liquids Impact the Bioenergy Feedstock-Degrading Microbiome and Transcription of Enzymes Relevant to Polysaccharide Hydrolysis
Source: PubMed Central journal article supplement (PMC5155067; doi:10.1128/msystems.00120-16), 2016-12-13
Supplement: sys006162071st8.pdf [file sys006162071st8.pdf]

Table S8. Percentages of KO annotations matched to EC numbers

| KEGG annotation                      | Enzyme class      | Corresponding EC number | Matching accuracy <sup>1</sup> |
|--------------------------------------|-------------------|-------------------------|--------------------------------|
| K00925                               | Acetate kinase    | EC 2.7.2.1              | 100%                           |
| K01179, K19356, K19357<br>and K20542 | Endoglucanase     | EC 3.2.1.4              | 75.61%                         |
| K01225, K19668                       | Cellobiohydrolase | EC 3.2.1.91             | 14.29%                         |
| K01188, K05349, K05350               | Beta-glucosidase  | EC 3.2.1.21             | 93.28%                         |
| K01181, K13465                       | Xylanase          | EC 3.2.1.8              | 96.84%                         |

<sup>1</sup> Percentage of KEGG annotation matched to corresponding EC number
